# Supplementary material for: Molecular Characterization and Marker Development of the HMW-GS Gene from Thinopyrum elongatum for Improving Wheat Quality
Source: MDPI journal article supplement (doi:10.3390/ijms241311072), 2023-07-04
Supplement: s1 [file s1]

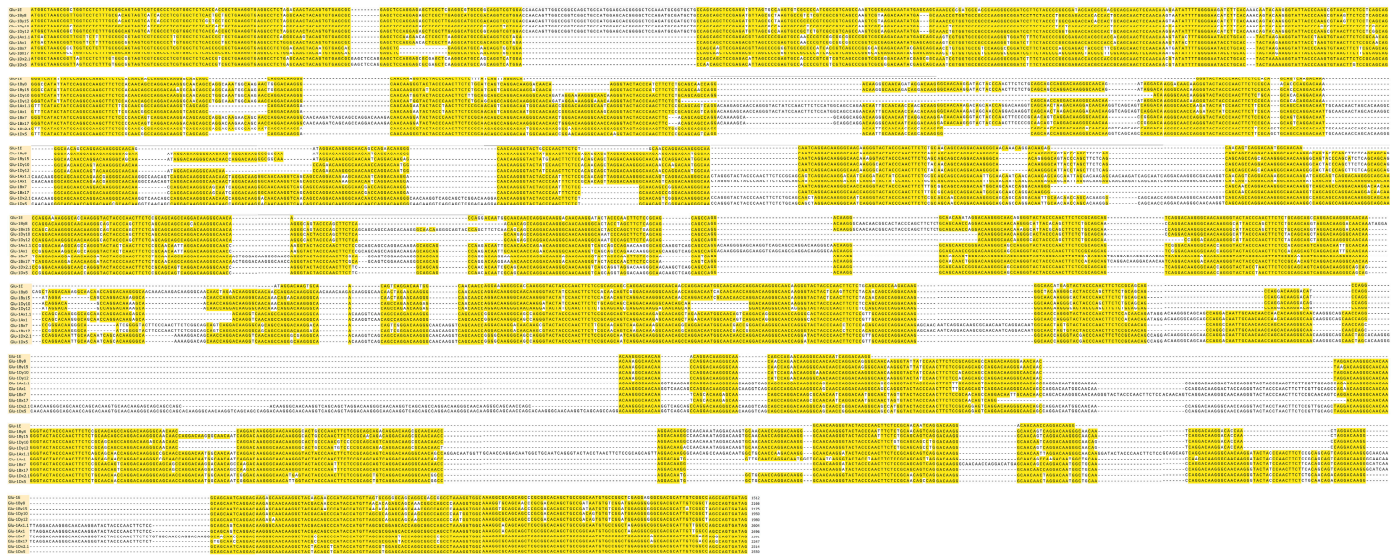

**Figure S1.** Sequence alignment of high molecular weight gluten genes of different subunits between *Th. elongatum* and common wheat. The yellow highlight indicates that the sequence has high homology.
