# Supplementary material for: Molecular Characterization and Marker Development of the HMW-GS Gene from Thinopyrum elongatum for Improving Wheat Quality
Source: Int J Mol Sci. 2023 Jul 4;24(13):11072. doi: 10.3390/ijms241311072 (PMC10341674; doi:10.3390/ijms241311072)
Supplement: Supplementary file 1 [file ijms-24-11072-s001.zip › Supplementary Table S1.xlsx]

## Sheet: Sheet1
HMW-GS Name	NCBI GenBank NO.	Amino Acid Sequence
Glu-1E		MAKRLVLFAAVVVALVALTTAEGEASRQLQCERELQESSLEACRQVVDQQLAGQLPWSTG LQMRCCQQLRDVSAKCRPIAVSQVARQYEQQTAMPPKGGSFYPGDTTPTQQLQQRIFWGR SSQTIQGYYPSVTSPQQGSYYPGQASPQQPGQGQQPGQGQQRYYPTSLYQLGHGYYPTSP QQSRQRQQPGQGQQIGQGQQPEQGQQGYCPTSLQPGQGQQSGQGQQGYYPTSLQQPGQGQ QTGQEQQSGQWQQPGKGHQGYYPTSPQQPGQGQQPGQWQQPGQGQQGYYPTSPQQPGQGQ QIGQGQQGYYPTSPQQSGQGQQGYYPTSLQQPGQGQQIGQVQQSGQWQQPGKGHQGYYPT SPQQPGQGQQPGQWQQPGQGQQGYYPTSLQQPR…
Glu-1Ax1	X61009.1	MTKRLVLFAAVVVALVALTAAEGEASGQLQCERELQEHSLKACR QVVDQQLRDVSPECQPVGGGPVARQYEQQVVVPPKGGSFYPGETTPPQQLQQSILWGI PALLRRYYLSVTSPQQVSYYPGQASSQRPGQGQQPGQGQQEYYLTSPQQSGQWQQPGQ GQAGYYPTSPQQSGQEQPGYYPTSPWQPEQLQQPTQGQQRQQPGQGQQLRQGQQGQQS GQGQPRYYPTSSQQPGQLQQLAQGQQGQQPERGQQGQQSGQGQQLGQGQQGQQPGQKQ QSGQGQQGYYPISPQQLGQGQQSGQGQLGYYPTSPQQSGQGQSGYYPTSAQQPGQLQQ STQEQQLGQEQQDQQSGQGRQGQQSGQRQQDQQSGQGQQPGQRQPGYYSTSPQQLGQG …
Glu-1Ax1.1	JN172932.1	MTKRLVLFAAVVVALVALTAAEGEASGQVQCERELQEHSLKACR QVVDQQLRDVSPECQPVGGGPVARQYEQQVVVPPKGGSFYPGETTPPQQLQQSILWGI PALLRRYYLSVTSPQQVSYYPGQASSQRPGQGQQPGQGQQEYYLTSPQQSGQWQQPGQ GQSGYYPTSPQQSGQEQPGYYPTSPWQPEQLQQPTQGQQRQQPGQGQQLRQGQQGQQS GQGQPRYYPTSSQQPGQLQQLAQGQQGQQPERGQQGQQSGQGQQLGQGQQGQQPGQKQ QSGQGQQGYYPISPQQLGQGQQSGQGQLGYYPTSPQQSGQGQSGYYPTSAQQPGQLQQ STQEQQLGQEQQDQQSGQGRQGQQSGQRQQDQQSGQGQQPGQRQPGYYSTSPQQLGQG …
Glu-1Ax2*	M22208.2	MTKRLVLFAAVVVALVALTAAEGEASGQLQCERELQEHSLKACR QVVDQQLRDVSPECQPVGGGPVARQYEQQVVVPPKGGSFYPGETTPPQQLQQSILWGI PALLRRYYLSVTSPQQVSYYPGQASSQRPGQGQQEYYLTSPQQSGQWQQPGQGQSGYY PTSPQQSGQKQPGYYPTSPWQPEQLQQPTQGQQRQQPGQGQQLRQGQQGQQSGQGQPR YYPTSSQQPGQLQQLAQGQQGQQPERGQQGQQSGQGQQLGQGQQGQQPGQKQQSGQGQ QGYYPISPQQLGQGQQSGQGQLGYYPTSPQQSGQGQSGYYPTSAQQPGQLQQSTQEQQ LGQEQQDQQSGQGRQGQQSGQRQQDQQSGQGQQPGQRQPGYYSTSPQQLGQGQPRYYP …
Glu-1Ax-null	AF145590.1	MTKRLVLFAAVVVALVALTAAEGEASGQLQCERELQEHSLKACR QVVDQQLRDVSPECQPVGGGPVARQYEQQVVVPPKGGSFYPGETTPPQQLQQSILWGI PALLRRYYLSVTSPQRVSYYPGQASSQRPGQGQQPGQGQQEYYLTSPQQSGQWQQPGQ GQSGYYPTSPQQSGQEQPGYYPTSPWQPEQLQQPTQEQQRQQPGQGQQLRQGQQGQQS GQGQPRYYPTSSQQPGQLQQLTQGQQGQQPERGQQGQQSGQGQQLGQGQQGQRPGQKQ QSGQGQQGYYPISPQQLGQGQQSGQGQLGYYPTSPQQSGQGQSGYYPTSAQQPGQLQQ STQEQQLGQEQQDQQSGQGRQGQQSGQRQQDQQSGQGQQPGQRQPGYYSSSPQQLGQG …
Glu-1Bx7	DQ119142	MAKRLVLFAAVVVALVALTAAEGEASGQLQCEHELEACQQVVDQ QLRDVSPGCRPITVSPGTRQYEQQPVVPSKAGSFYPSETTPSQQLQQMIFWGIPALLR RYYPSVTSSQQGSYYPGQASPQQSGQGQQPGQEQQPGQGQQDQQPGQRQQGYYPTSPQ QPGQGQQLGQGQPGYYPTSQQPGQKQQAGQGQQSGQGQQGYYPTSPQQSGQGQQPGQG QPGYYPTSPQQSGQWQQPGQGQQPGQGQQSGQGQQGQQPGQGQRPGQGQQGYYPISPQ QPGQGQQSGQGQPGYYPTSLRQPGQWQQPGQGQQPGQGQQGQQPGQGQQSGQGQQGYY PTSLQQPGQGQQLGQGQPGYYPTSQQSEQGQQPGQGKQPGQGQQGYYPTSPQQSGQGQ …
Glu-1Bx13	EF540764	MAKRLVLFAAVVVALVALTAAEGEASGQLQCERELEACQQVVDQ QLRDVSPGCRPITVSPGTRQYERQPVVPSKAGSFYPSKTTPSQQLQQMIFWGIPALLR RYYPSVTSSQQGSYYPGQASPQQLGQGQQPGQGQQPRQEQQDQQPGQRQQGYYPTSPQ QPGQGQQLGQGQPGYYPTSQQPGQKQQAGQGQQSGQGQQGYYPTSPQQSGQGQQPGQG QAGYYPTSPQQSGQWQQPGQGQQPGQGQQSGQGQQGQQPGQGQRPGQGQQGYYPTSPQ QPGQGQQSGQGQPGYYPTSLRQPGQWQQPGQGQQPGQGQQGQQPGQGQQPGQGQQGYY PTSLQQPGQGQQPGQGQPGYYPTSQQSEQGQQPGQGKQPGQGQQGYYPTSSQQSGQGQ …
Glu-1Bx14	AY367771	MAKRLVLFAAVVVALMALTAAEGEASGQLQCERELRKRELEAYQ QVVDQQLRDVSPGYRPITVSPGTRQYEQQPVVPPKAGSFYPSETTPSQQLQQMIFWGI PALLRRYYPSVTSSQQGSYYPGQAFPQQSGQGQQPGQGQQPGQRQQDQQPGQGQQGYY PTSPQQPGQGQQLGQGQPGYYPTSQQPGQKQQAGQGQQSGQGQQRYYPTSPQQSGQGQ QPGQGQPGYYPISPQQSEQWQQPGQGQQPGQGQQSGQGQQGQQPGQGQRPGQGQQGYY PTSLQQPRQGQQSGQGQPGYYPTSSRQPGQWQQPGQGQQPGQGQQGQQPGQGQQPGQG QQGYYPTSLQQPGQGQQPGQGQPGYYPTSPQQPGQGKQPGQGQQRYYPTSSQQSGQGQ …
Glu-1Bx17	AB263219	MAKRLVLFAAVVVALVALTAAEGEASGQLQCEHELEACQQVVDQ QLRDVSPGCRPITVSPGTRQYEQQPVVPSKAGSFYPSETTPSQQLQQMIFWGIPALLR RYYPSVTSSQQGSYYPGQASPQQSGQGQQPGQEQQPGQGQQDQQPGQRQQGYYPTSPQ QPGQGQQLGQGQPGYYPTSQQPGQKQQAGQGQQSGQGQQGYYPTSPQQSGQGQQPGQG QPGYYPTSPQQSGQWQQPGQGQQPGQGQQSGQGQQGQQPGQGQRPGQGQQGYYPISPQ QPGQGQQSGQGQPGYYPTSLRQPGQWQQPGQGQQPGQGQQGQQPGQGQQSGQGQQGYY PTSLQQPGQGQQLGQGQPGYYPTSQQSEQGQQPGQGKQPGQGQQGYYPTSPQQSGQGQ …
Glu-1Bx23	AB263219	MAKRLVLFAAVVVALVALTAAEGEASGQLQCERELEACQQVVDQ QLRDVSPGCRPITVSPGTRQYEQQPVMPSKAGSFYPSETTPSQQLQQMIFWGIPALLR RYYPSVTSSQQGSYYPGQASPQQSGQGQQPGQGQQPEQRQQDQQPGQRQQGYYPTSPQ QPGQGQQLGQGQPRYYPTSQQPGQKQQAGQGQQSGQGQQGYYPTSPQQSGQGQQPGQG QSRYYPTSPQQSGQWQQPGQGQQPGQGQQLGQGQQGQQPGQGQRPGQGQQGYYPTSPQ QPGQGQQSGQGQPGYYPTSLRQPGQWQQPGQGQQPGQGQQGQQPGQGQQPGQGQGGYY PTSLQQPGQGQQPGQGQSGYYPTSQQSEQGQQPGQGKQPGQGQQGYYPTSSQQSGQGQ …
Glu-1By8	JF736014	MAKRLVLFATVVITLVALTAAEGEASRQLQCERELQESSLEACR QVVDQQLAGRLPWSTGLQMRCCQQLRDVSAKCRLVAVSQVVRQYEQTVVPPKGGSFYP GETTPLQQLQQVIFWGTSSQTVQGYYPSVSSPQQGPYYPGQASPQQPGQGQQPGKWQE LGQGQQGYYPTSLHQSGQGQQGYYPSSLQQPGQGQQIGQGQQGYYPTSLQQPGQGQQI GQGQQGYYPTSPQHPGQRQQPGQGQQIGQGQQLGQGRQIGQGQQSGQGQQGYYPTSPQ QLGQGQQPGQWQQSGQGQQGYYPTSQQQPGQGQQGQYPASQQQPGQGQQGQYPASQQQ PGQGQQGQYPASQQQPAQGQQGQYPASQQQPGQGQQGHYLASQQQPGQGQQRHYPASL …
Glu-1By9	X61026	MAKRLVLFATVVITLVALTAAEGEASRQLQCERELQESSLEACR QVVDQQLAGRLPWSTGLQMRCCQQLRDVSAKCRPVAVSQVVRQYEQTVVPPKGGSFYP GETTPLQQLQQVIFWGTSSQTVQGYYPSVSSPQQGPYYPGQASPQQPGQGQQPGKWQE LGQGQQGYYPTSLHQSGQGQQGYYPSSLQQPGQGQQIGQGQQGYYPTSLQQPGQGQQI GQGQQGYYPTSPQHPGQRQQPGQGQQIGQGQQLGQGRQIGQGQQSGQGQQGYYPTSPQ QLGQGQQPGQWQQSGQGQQGYYPTSQQQPGQGQQGQYPASQQQPGQGQQGQYPASQQQ PGQGQQGQYPASQQQPGQGQQGHYLASQQQPGQGQQRHYPASLQQPGQGQQGHYTASL …
Glu-1By15	DQ086215	MAKRLVLFATVVITLVALAAAEGEASRQLQCERELQESSLEACR QVVDQQLAGRLPWSTGLQMRCCQQLRDVSAKCRPVAVSQVVRQYEQTVVPPKGGSFYP GETTPLQQLQQVIFWGTSSQTVQGYYPSVSSPQQGPYYPGQASPQQPGQRQQPGKWQE LGQGQQGYYPTSLHQSGQGQQGYYPSSLQQPGQGQQTGQGQQGYYPTSLQQPGQGQQI GQGQQGYYPTSPQHPGQRQQPGQGQQIGQGQQPGQGRQIGQGQQSGQEQQGYYATSPQ QLGQGQQPGQWQQSGQGQQRYYPTSQQQPGQGQQGQYPASQQQPAQGQQGQYPASQQQ PAQGQQGQYPASQQQPGQGQQGQYPASQQQPAQGQQGQYPASQQQPGQGQQGHYPASE …
Glu-1By16	EF540765	MAKRLVLFATVVITLVALTAAEGEASRQLQCERELQESSLEACR QVVDQQLAGRLPWSTGLQMRCCQQLRDVSAKCRPVAVSQVVRQYEQIVVPPKGGSFYP GETTPLQQLQQVIFWGTSSQTVQGYYPSVSSPQQGPYYPGQASPQQPGQGQQPGKWQE LGQGQQGYYPTSLHQSGQGQQGYYPSSLQQPGQGQQTGQGQQGYYPTSLQQPGQGQQI GQGQQGYYPTSPQHPGQRQQPGQGQQIGQEQQLGQGRQIGQGQQSGQGQQGYYPTSPQ QLGQGQQPGQWQQSGQGQQGYYPTSQQQPGQGQQGQYPASQQQPGQGQQGQYPASQQQ PGQGQQGQYPASQQQPAQGQQGQYPASQQQPGQGQQGHYLASQQQPGQGQQRHYPASL …
Glu-1By18	KF430649	MAKRLVLFATVVITLVALTAAEGEASRQLQCERELQESSLEACR QVVDQQLAGRLPWSTGLQMRCCQQLRDVSAKCRPVAVSQVVRQYEQTVVPPKGGSFYP GETTPLQQLQQVIFWGTSSQTVQGYYPSVSSPQQGPYYPGQASPQQPGQGQQPGKWQE LGQGQQGYYPTSLHQSGQGQQGYYPSSLQQPGQGQQIGQGQQGYYPTSLQQPGQGQQI GQGQQGYYPTSPQHPGQRQQPGQGQQIGQGQQLGQGRQIGQGQQSGQGQQGYYPTSPQ QLGQGQQPGQWQQSGQGQQGYYPTSQQQPGQGQQGQYPASQQQPGQGQQGQYPASQQQ PGQGQQGQYPASQQQPAQGQQGQYPASQQQPGQGQQGHYLASQQQPGQGQQRHYPASL …
Glu-1Dx1.5*	KF430649	MAKRLVLFVAVVVALVALTVAEGEASEQLQCERELQELQERELK ACQQVMDQQLRDISPECHPVVVSPVAGQYEQQIVVPPKGGSFYPGETTPPQQLQQRIF WGIPALLKRYYPSVTSPQQVSYYPGQASPQRPGQGQQPGQGQQSGQGQQGYYPTSPQQ PGQWQQPEQGQPGYYPTSPQQPGQLQQPAQGQQPGQGQQGQQPGQGQPGYYPTSSQLQ PGQLQQPAQGQQGQQPGQGQQGQQPGQGQQPGQGQQGQQPGQGQQPGQGQQGQQLGQG QQGYYPTSLQQSGQGQPGYYPTSLQQLGQGQSGYYPTSPQQPGQGQQPGQLQQPAQGQ QPGQGQQGQQPGQGQQGQQPGQGQQPGQGQPGYYPTSPQQSGQGQPGYYPTSSQQPTQ …
Glu-1Dx2.1	AY517724.2	MAKRLVLFVAVVVALVALTVAEGEASEQLQCERELQELQERELK ACQQVMDQQLRDISPECHPVVVSPVAGQYERQIVVPPKGGSFYPGETTPPQQLQQRIF WGIPALLKRYYPSVTSPQQVSYYPGQASPQRPGQGQQPGQGQQSGQGQQGYYPTSPQQ PGQWQQPEQGQPGYYPTSPQQPGQLQQPAQGQQPGQGQQGQQPGQGQPGYYPTSSQLQ PGQLQQPAQGQQGQQPGQGQQGQQPGQGQQPGQGQQGQQPGQGQQPGQGQQGQQLGQG QQGYYPTSLQQSGQGQPGYYPTSLQQLGQGQSGYYPTSPQQPGQGQQPGQLQQPAQGQ QPGQGQQGQQPGQGQQGQQPGQGQQPGQGQPGYYPTSPQQSGQGQPGYYPTSSQQPTQ …
Glu-1Dx2.2v	KC881262	MAKRLVLFVAVVVALVALTVAEGEASEQLQCERELQELQERELK ACQQVMDQQLRDISPECHPVVVSPVAGQYEQQIVVPPKGGSFYPGETTPPQQLQQRIF WGIPALLKRYYPSVTSPQQVSYYPGQASPQRPGQGQQPGQGQQSGQGQQGYYPTSPQQ PGQWQQPEQGQPGYYPTSPQQPGQLQQPAQGQQPGQGQQGRQPGQGQPGYYPTSSQLQ PGQLQQPAQGQQGQQPGQGQQGQQPGQGQQPGQGQQGQQPGQGQQPGQGQQGQQLGQG QQGYYPTSLQQSGQGQPGYYPTSLQQLGQGQSGYYPTSPQQPGQGQQPGQLQQPAQGQ QPEQGQQGQQPGQGQQGQQPGQGQQPGQGQPGYYPTSPQQSGQGQPGYYPTSSQQPTQ …
Glu-1Dx2.6	AB359016.2	MAKRLVLFVAVVVALVALTVAEGEASEQLQCERELQELQERELK ACQQVMDQQLRDISPECHPVVVSPVAGQYEQQIVVPPKGGSFYPGETTPPQQLQQRIF WGIPALLKRYYPSVTSPQQVSYYPGQASPQRPGQGQQPGQGQQSGQGQQGYYPTSPQQ PGQWQQPEQGQPGYYPTSPQQPGQLQQPAQGQQPGQGQQGRQPGQGQPGYYPTSSQLQ PGQLQQPAQGQQGQQPGQGQQGQQPGQGQQPGQGQQGQQPGQGQQPGQGQQGQQLGQG QQGYYPTSLQQSGQGQPGYYPTSLQQLGQGQSGYYPTSPQQPGQGQQPGQLQQPAQGQ QPEQGQQGQQPGQGQQGQQPGQGQQPGQGQPGYYPTSPQQSGQGQPGYYPTSSQQPTQ …
Glu-1Dx5'	HM050419.1	MAKRLVLFVAVVVALVALTVAEGEASEQLQCERELQELQERELK ACQQVMDQQLRDISPECHPVVVSPVAGQYEQQIVVPPKGGSFYPGETTPPQQLQQRIF WGIPALLKRYYPSVTSPQQVSYYPGQASPQRPGQGQQPGQGQQSGQGQQGYYPTSPQQ PGQWQQPEQGQPGYYPTSPQQPGQLQQPAQGQQPGQGQQGRQPGQGQPGYYPTSSQLQ PGQLQQPAQGQQGQQPGQGQQGQQPGQGQQPGQGQQGQQPGQGQQPGQGQQGQQLGQG QQGYYPTSLQQSGQGQPGYYPTSLQQLGQGQSGYYPTSPQQPGQGQQPGQLQQPAQGQ QPEQGQQGQQPRQGQQGQQPGQGQQPGQGQPGYYPTSPQQSGQGQPGYYPTSSQQPTQ …
Glu-1Dy3	KF466260.1	MAKRLVLFVAVVVALVALTVAEGEASEQLQCERELKACQQVMDQ QLRDISPECHPVVVSPVAGQYEQQIVVPPKGGSFYPGETTPPQQLQQRIFWGIPALLK RYYPSVTSPQQVSYYPGQASPQRPGQGQQPGQGQQSGQGQQGYYPTSPQQPGQWQQPE QGQPGYYPTSPQQPGQLQQPAQGQQPGQGQQGRQPGQGQPGYYPTSSQLQPGQLQQPA QGQQGQQPGQGQQGQQPGQGQQPGQGQQGQQPGQGQQPGQGQQGQQLGQGRQGYYPTS LQQSGQGQPGYYPTSLQQLGQGQSGYYPTSPQQPGQGQQPGQLQQPAQGQQPEQGQQG QQPGQGQQGQQPGQGQQPGQGQPGYYPTSPQQSGQGQPGYYPTSSQQPTQSQQPGQGQ …
Glu-1Dy10	AB281268	MAKRLVLFAAVVIALVALTTAEGEASRQLQCERELQESSLEACR QVVDQQLAGRLPWSTGLQMRCCQQLRDVSAKCRSVAVSQVARQYEQTVVPPKGGSFYP GETTPLQQLQQGIFWGTSSQTVQGYYPGVTSPRQGSYYPGQASPQQPGQGQQPGKWQE PGQGQQWYYPTSLQQPGQGQQIGKGQQGYYPTSLQQPGQGQQGYYPTSLQHTGQRQQP VQGQQPEQGQQPGQWQQGYYPTSPQQLGQGQQPRQWQQSGQGQQGHYPTSLQQPGQGQ QGHYLASQQQPGQGQQGHYPASQQQPGQGQQGHYPASQQQPGQGQQGHYPASQQEPGQ GQQGQIPASQQQPGQGQQGHYPASLQQPGQGQQGHYPTSLQQLGQGQQTGQPGQKQQP …
Glu-1Dy10.1	AY695379	MAKRLVLFAAVVIALVALTTAEGEASRQLQCERELQESSLEACR QVVDQQLAGRPPWSTGLQMRCCQQLRDVSAKCRSVAVSQVARQYEQTVVPPKGGSFYP GETTPLQQLQQGIFWGTSSQTVQGYYPSVTSPRQGSYYPGQASPQQPGQGQQPGKWQE PGQGQQWYYPTSLQQPAQGQQIGKGKQGYYPTSLQQPGQGQQIGQGQQGYYPTSPQHT GQRQQPVQGQQIGQGQQPEQGQQPGQWQQGYYPTSPQQLGQGQQPGQWQQSGQGQQGH YPTSLQQPGQGQQGHYLASQQQPAQGQQGHYPASQQQPGQGQQGHYPASQQQPGQGHY PASQQEPGQGQQGQIPASQQQPGQGQQGHYPASLQQPGQQGHYPTSLQQLGQGQQIGQ …
Glu-1Dy11	EU528008	MAKRLVLFAAVVIALVALTTAEGEASRQLQCERELQESSLEACR QVVDQQLAGRLPWSTGLQMRCCQQLRDVSAKCRSVAVSQVARQYEQTVVPPKGGSFYP GETTPLQQLQQGIFWGTSSQTVQGYYPSVTSLRQGSYYPGQAPPQQPGQGQQPGKWQE PGQGQQWYYPTSLQQPGQGQQIGKGKQGYYPTSLQQPGQGQQIGQGQQGYYPTSPQHT GQRQQPVQGQQIGQGQQPEQGQQPGQWQQSGQGQQGHYPTSLQQPGQGQQGHYLASQQ QPAQGQQGHYPASQQQPGQGRQGHYPASQQQPGQGQQGHYPASQQEPGQGQQGQIPAS QQQPGQGQQGHYPASLQQPGQQGHYPTSLQQLGQGQQIGQPGQKQQPGQGQQTGQGQQ …
Glu-1Dy12	BK006459.1	MAKRLVLFAAVVIALVALTTAEGEASRQLQCERELQESSLEACR QVVDQQLAGRLPWSTGLQMRCCQQLRDVSAKCRSVAVSQVARQYEQTVVPPKGGSFYP GETTPLQQLQQGIFWGTSSQTVQGYYPSVTSPRQGSYYPGQASPQQPGQGQQPGKWQE PGQGQQWYYPTSLQQPGQGQQIGKGKQGYYPTSLQQPGQGQQIGQGQQGYYPTSPQHT GQRQQPVQGQQIGQGQQPEQGQQPGQWQQGYYPTSPQQLGQGQQPGQWQQSGQGQQGH YPTSLQQPGQGQQGHYLASQQQPAQGQQGHYPASQQQPGQGQQGHYPASQQQPGQGQQ GHYPASQQEPGQGQQGQIPASQQQPGQGQQGHYPASLQQPGQQGHYPTSLQQLGQGQQ …
Glu-1Dy12.2*	FJ226583	MAKRLVLFAAVVIALVALTTAEGEASRQLQCERELQESSLEACR QVVDQQLAGRLPWSTGLQMRCCQQLRDVSAKCRSVAVSQVARQYEQTVVPPKGGSFYP GETTPLQQLQQGIFWGTSSQTVQGYYPSVTSPRQGSYYPGQASPQQPGQGQQPGKWQE PGQGQQWYYPTSLQQPGQGQQIGKGKQGYYPTSLQQPGQGQQIGQGQQGYYPTSPQHT GQRQQPVQGQQIGQGQQPEQGQQPGQWQQGYYPTSPQQLGQGQQPGQWQQSGQGQQGH YPTSLQQPGQGQQGHYLASQQQPAQGQQGHYPASQQQPGQGRQGTTQLLSSSQDQGQQ GHYPASQQEPGQGQQGQIPASQQQPGQGQQGHYPASLQQPGQQGHYPTSLQQLGQGQQ …
Glu-1Dy12.3	EF472958	MAKRLVLFAAVVIALVALTTAEGEASRQLQCERELQESSLEACR QVVDQQLAGRLPWSTGLQMRCCQQLRDVSAKCRSVAVSQVARQYEQTVVPPKGGSFYP GETTPLQQLQQGIFWGTSSQTVQGYYPSVTSPRQGSYYPGQASPQQPGQGQQPGKWQE PGQGQQWYYPTSLQQPGQGQQMGKGKQGYYPTSLQQPGQGQQIGQGQQGYYPTSPQHT GQRQQPVQGQQIGQGQQPEQGQQPGQWQQGYYPTSPQQLGQGQQPGQWQQSGQGQQGH YPTSLQQPGQGQQGHYLASQQQPAQGQQGHYPASQQQPGQGQQGHYPASQQQPGQGQQ GHYPASQQEPGQGQQGQIPASQQQPGQGQQGHYPASLQQPGQQGHYPTSLQQLGQGQQ …
Glu-1Dy12.6	KR262518	MAKRLVLFAAVVIALVALTTAEGEASRQLQCERELQESSLEACR QVVDQQLAGRLPWSTGLQMRCCQQLRDVSAKCRSVAVSQVARQYEQTVVPPKGGSFYP GETTPLQQLQQGIFWGTSSQIVQGYYPSVTSPRQGSYYPGQASPQQPGQGQQPGKWQE PGQGQQWYYPTSLQQPGQGQQIGKGKQGYYPTSLQQPGQGQQIGQGQQGYYPTSPQHT GQRQQPVQGQQIGQGQQPEQGQQPGQWQQGYYPTSPQQLGQGQQPGQWQQSGQGQQGH YPTSLQQPGQGQQGHYLASQQQPAQGQQGHYPASQQQPGQGQQGHYPASQQQPGQGQQ GHYPASQQQPGQGQQGHYPASQQEPGQGQQGQIPASQQQPGQGQQGHYPASLQQPGQQ …
Glu-1Dy12.7	KR262519	MAKRLVLFAAVVIALVALTTAEGEASRQLQCERELQESSLEACR QVVDQQLAGRLPWSTGLQMRCCQQLRDVSAKCRSVAVSQVARQYEQTVVPPKGGSFYP GETTPLQQLQQGIFWGTSSQTVQGYYPSVTSPRQGSYYPGQASPQQPGQGQQPGKWQE LGQGQQEYYPTSLHQSGQGQQGYYPSSLQQSGQGQQIGQGQQGYYPTSPQHPGQRQQP GQGQQIGQGQQPGQGRQIGQGQQPGQWQQGYYPTSPQQLGQGQQPGQWQQSGQGQQGH YPTSLQQPGQGQQGHYLASQQQPAQGQQGHYPASQQQPGQGQQGHYPASQQQPGQGQR GHYPASQQEPGQGQQGQIPASQQQPGQGQQGHYPASLQQPGQQGHYPTSLQQLGQGQQ …
Glu-1Rx	AF216868	MAKRLVLFAAVVVALVALTVAEGEASGQLQCERELQERELEACR QIVDQQLRDTSPGCRPVAVSPGTGQQEQQTVVPLKGGSFYPDETSPPQQLEQRILWGI PTLLKRYYPSVTSPHQGSYYPGQTSLQQPGQAQQPGQGQQPGQAQQPGHGQQSGQGQQ PEKGQQGYYPTTPQQPGQGQQPGQGQPGYYLTSSQQPGQGQQPGQGQPGYYPTSSQQL GQGQQLGQGQQGQQPGQGQPGYYPTSPQQPGQGQQPGQGQHPGQGQQGQQPGQGQQGQ QPGQGQQPGEGQQGYYPTFPQQPGQVQQPGQGQQPGQGQPGYYPTSPQQPGQGQQPGQ EQQPGQRQQPGQGKPGYYPTSPQQSGQGQSGYYPTSPQQPGQGQQPGQGQQVQQPGQG …
Glu-1Ry	AF216869	MAKRLVLFGIVVIALVALTAAEGEASRQLQCERELQESSLEACR QVVDQQLAGRLPWSTGLQMRCCQQLRDVSAKCRRVAVSQVARQYEQTAVPPKGGSIYP GETTPLQQLQQGIFWGTSSQTVQGYYPSVTSPQQGSYYPGQASPQQPGQGQQQGKWQE PGQGQQGYYPTSQQQPGQGQQGHYPASQQQPGQGQQGHYPASLQQPGQGQQGHYPASL QQPGQGQQTEQPGQMQQPGQGQQIGQGQQPGQGQQIGQGQQIRQGQQPGQGQQGYYQT HPQQPGQGQQPGQGQQGYYPTSPQQPGQGQQGHYPGSLRQPGQGQPGQRQQPGQGQQT GQGQQPEQEQQPGQGQQGYYPTSPQQPGQGQQPGQGQQGYYPTSLQQPGQGQQPHYPA …
Glu-1Cx	AF476959	MAKRLVLFVAVVVALVALTVAEGEASGQLQCERELQERELKACQ QVMDQQLRDISPKCHPVVVSPVAGQYEQQIVVPPKGGSFYPGETTPPQQLQQSIFWGI PALLKRYYPSVTSPQQVSYYPGQASPQRPGQGQQPGQGQQSVQEQQGYYSTSPQQPGQ WQQPEQGQPGYYPTSLQQPGQLQQPAQGQQGQQPGQGQQGQQLGQGQGYYPTSLQQSG QGQPGYYPTFLRQPGQGQSGYYPTSPQQPGQGQQPEQLQQPAQRQQSGQGQQGQQPAQ GQQGQQPAQGQQGQQGQQPAQGQQGQQGQQPAQGQQPGQGQLGYYPTSPQQSGQGQPG YYPTSSQQPGQSQQPGQGQQGQQLGQGQQAQQPGQGQQPGQGQPGYYPTSSQQSGQGQ …
Glu-1Cy	AF476960	MAKRLVLFVTVVIALVSLTAAEGEASRQLQCERELQESSLEACS QVVDQQLAGRLPWSTGLQMRCCQQLRDVSAKCRPVAVSQVARQYEQTVLPPTGGSFYP RETTPLQQLQQGIFWGTSSQTVQGYYPSVTSPHQGSYYPGQASSQQLGQGQQPGQGQQ PGKWQEPGQGQQGYYLTYLQQPGQGQQGYYLTSLQQPGQGQQIGQWQQGYYPTSLQHP GQRQQLGQGQHIGQGQQPGQGQQIGQGQQPGHGQQGYYPTSPLQSGQGQQPGQWQQPG QGQQGYYTTSLQQPGQGQQGHYPASQHQPGQGQQGHYPASLQQSGQGQQGLHPASLQQ PGQGQQTGQPGQRQQPGQGQQTGQGQQPEQEQQPGQGKQGYYPTSLWQPGQGQQPEQW …
Glu-1Ux	AF476961	MAKRLVLFVAVVVALVALTVAEGEASGQLQCERELQERELKACQ QVMDQQLRDISPKCHPVVVSPVAGQYEQQIVVPPKGGSFYPGETTPPQQLQQSIFWGI PALLKRYYPSVTSPQQVSYYPGQASPQWSGQGQQPGQGQQSVQGQQGYYSTSPQQPGQ WQQPEQGQPEYYPTSLQQPGQLQQPAQGQQGQQPGQGQQGQQPGQGQPGYYPTSSQLQ PGQLQQPAQGQQGQQPGQGQQGQQPGQGQQSGQGQQGQQPGQRQQSGQGQQGQQLGQG QQGYYPTSLQQSGQGQPGYYLTFLQQSGQGQSGYYPTSPQQPGQGQQPAQGQQPGQLQ QPAQGQQPGQGQQGQQPAQGQQGQQPTQGQQPGQGQPGYYPTSPQQSGQGQPGYYPTS …
Glu-1Uy	AF476962	MAKRLVLFATVVIALVALTTAKGEASRQLQCERELQESSLEACR QVVDQQLAGRLPWSTGLQMRCCQQLRDVSAKCRSVAVSQVARQYEQTVVPPKGGSFYP GETTPLQQLQQGIFWGTSSQTVQGYYPSVTSPRQGSYYPGQASPQQPGQGQQPGKWQE PRQGQQGYYPTSLQQPVQGQQIGQGQQGYYPTSPQHTGQRQQPVQGQQIGQGQQPEQG QQLGQWQQGYYPTSPQQLGQGQQPGQWQQSGQGQQGHYLASLQQPGQGQQGHYLASQQ QPGQGQQGHYPASQQQPGQGQQGHYPASQQQPGQGQQGHYPASQQEPGQGQQGQIPAS QQQPGQGQQGHYPASQQEPGQGQQGQIPASQQQPGQGQQGHYPASLQQPGQGQQGHYP …
Glu-1Ey1.5	AY299518.1	MAKRLVLFAAVVVALVALTTAEGEASRQLQCERELQESSLEACR QVVDQQLAGQLPWSTGLQMRCCQQLRDVSAKCRPVAVSQVARQYEQQTTMPPKGGSFY PGDTTPTQQLQQRIFWGRSSQTVQGYYPSVTSPQQGSYYPGQASPQQPGQGQQPGQGQ QPGQGQQGYYPTSLHQLGHGYYPTSPQQSRQRQQPGQGQQPEQRQQGYCPTSPQPGQG QQGYYPTSLQQPGQGQQTGQEQQSGQWQQLGKGHQGYYPTSPQQPGQGQQPGQWQQLG QGQQGYYPTSPQQPGQGQQIGQGQQGYFPTSPQQSGQGQQGYYPTSLQQLGQGQQIGQ VQQPGQWQQPGKGHQGYYPTSPQQPGQGQQPGQWQQPGQGQQGYYPTSPQQPGQGQHE …
Glu-1Ex1	EF204545.1	MAKRLVLFAALVVALVALTAAEGEASGQLQCERELQACQQVVNQ QLRDASPECRLVAVSPVARQYEQQTVVPPKGGSFYPGETTPPQQLQQKIFWGIPTLLR RYYPSVASPQQGSYYPGQTSPQRSGQGQQPGQGQQPEQGQQGQQPGQGQQPGQGQQGQ QSGQGQQPGQGQQGYYPTSSQQPGQGQQPGQGQPGYYSTSSQQPGQGQQPGQRQQSGQ GQSGYYPTSPQQPGQGQQLGHGQQPGQGQQPGQGQQGQQPGQGQQSEQGQQGYFPTSP QQPGQGQQPGQWQQPGQGQPGYYPTSPQQPGQGQQPGQGQQPGQGQQPGQGQPGYYPT SPQQPGQGQQRGQGQQPGQGQQLGQGQQGQQPGQGQQPGQGQQGYYPTSPQQPGQEQQ …
